# Supplementary figures and images for: Juvenile hormone counteracts the bHLH-PAS transcription factors MET and GCE to prevent caspase-dependent programmed cell death inDrosophila
Source: Oxford University Press journal article supplement (doi:10.1242/dev.033712), 2009-05-22

# S1

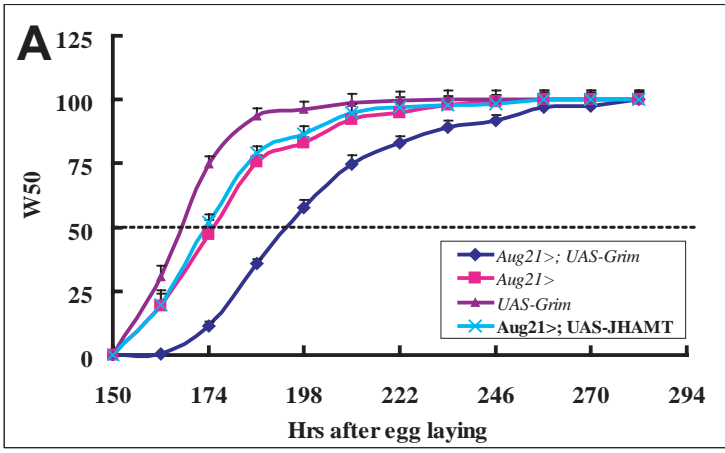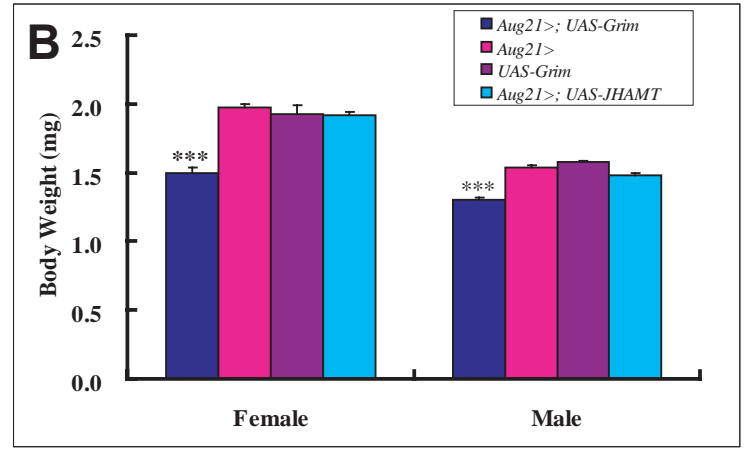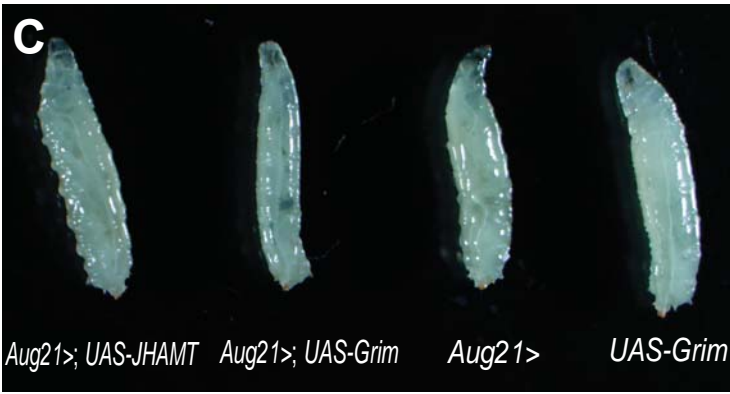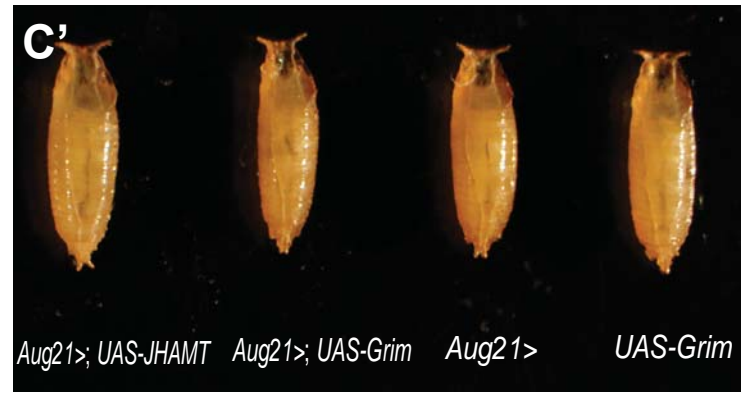

Supplement: dev033712-sup-033712-figs1.pdf [file dev033712-sup-033712-figs1.pdf]

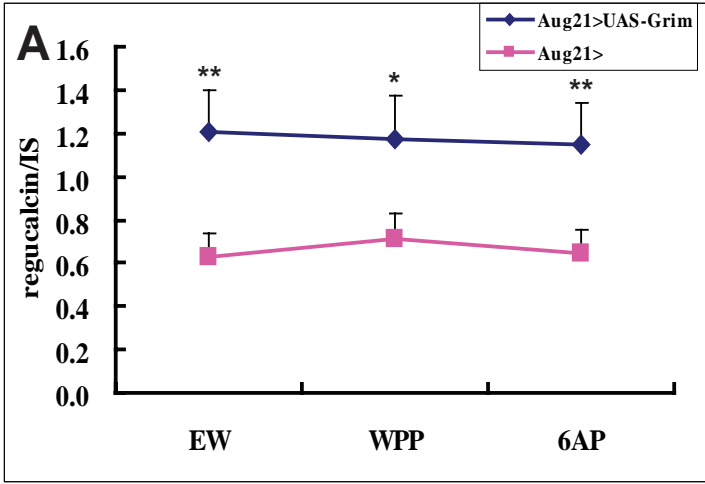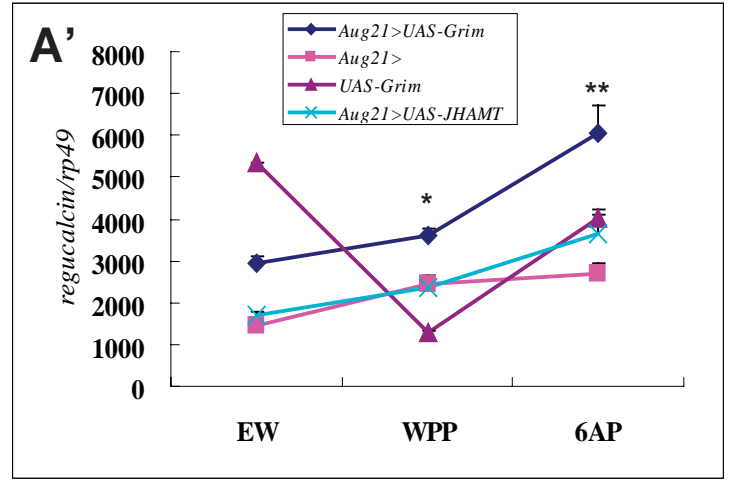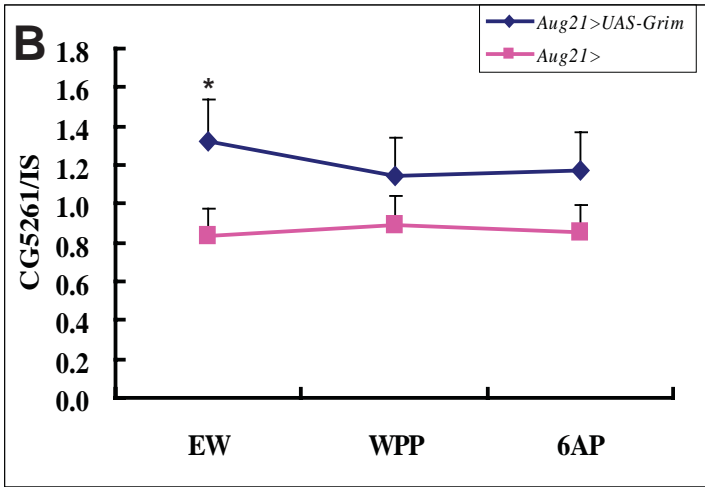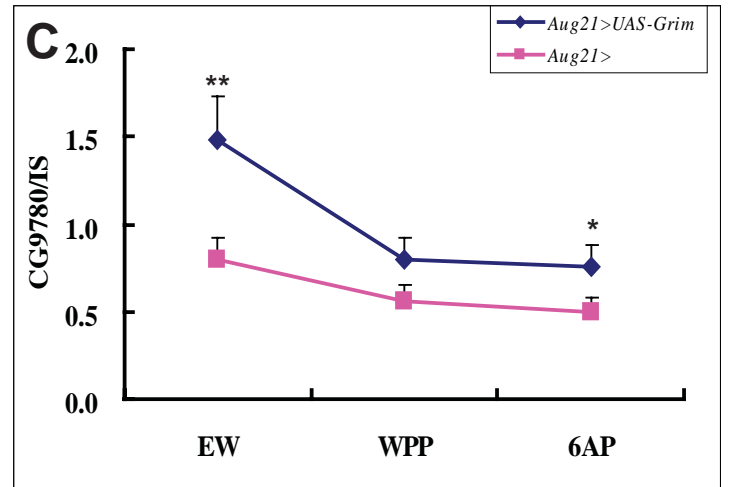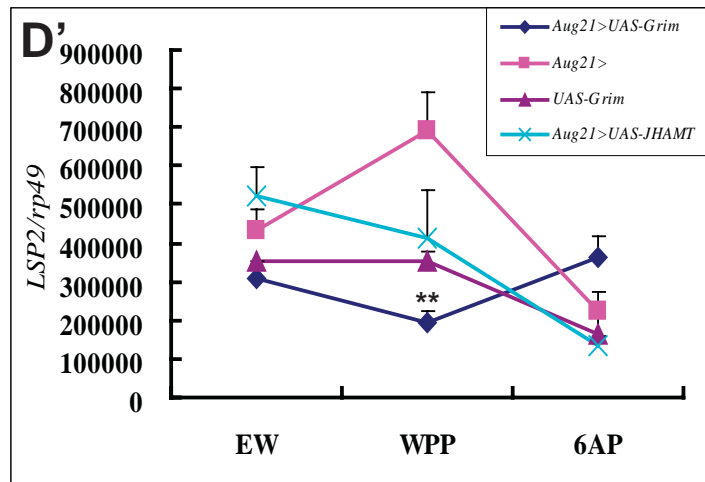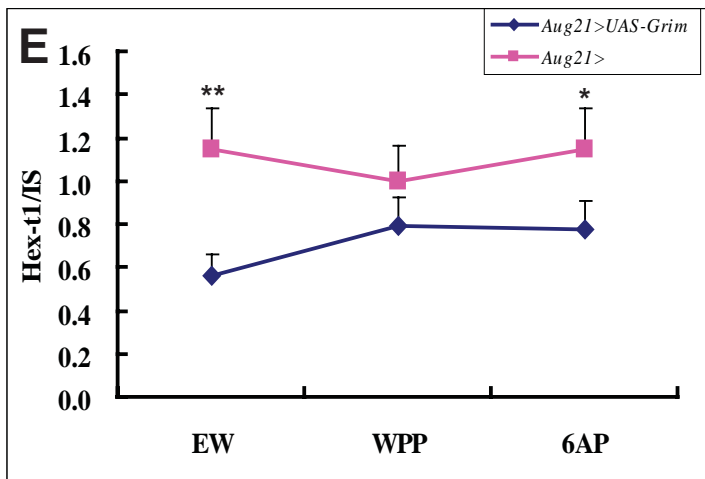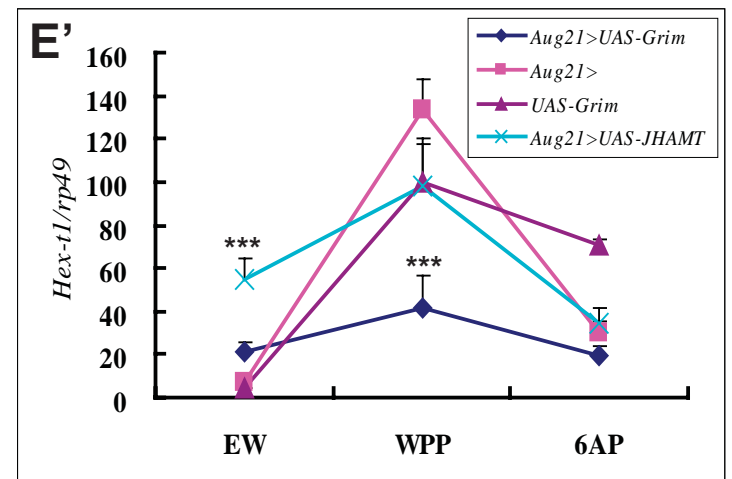

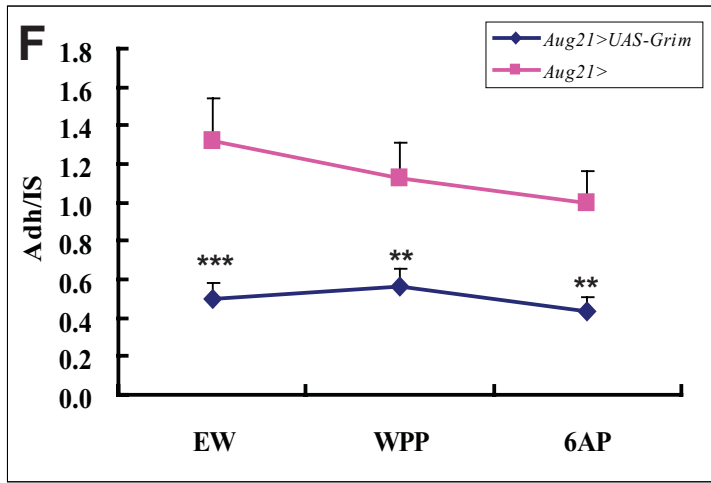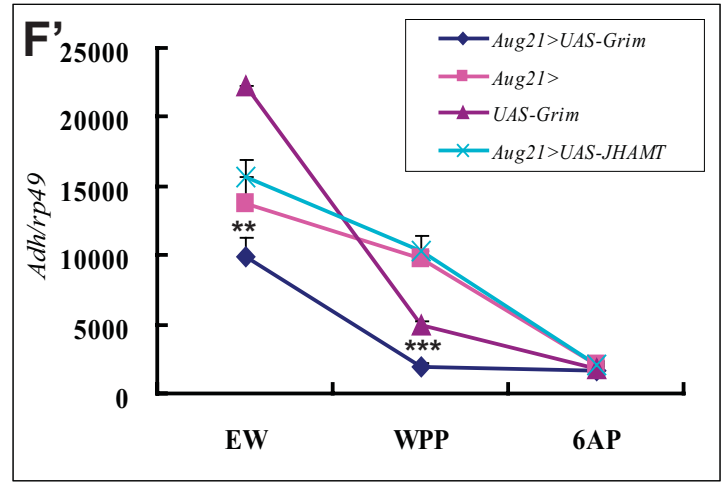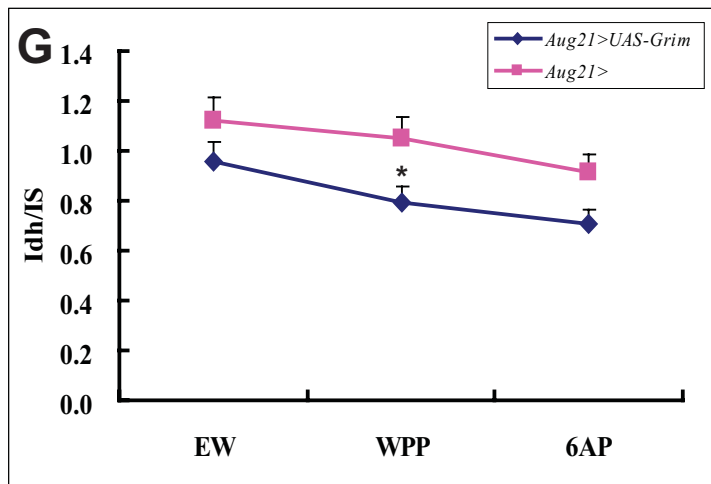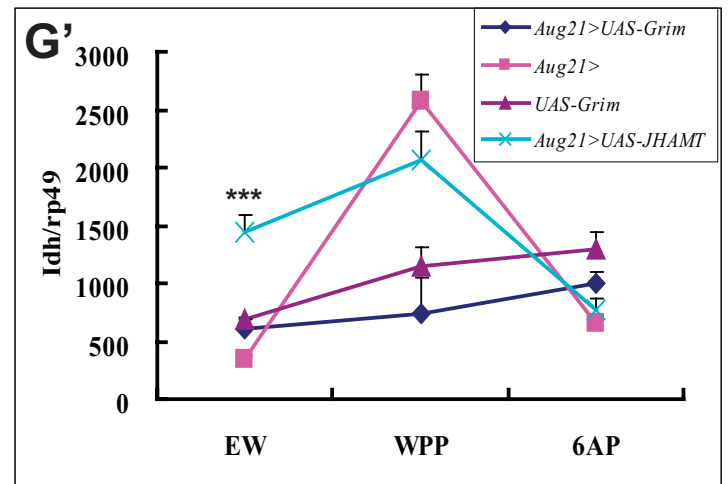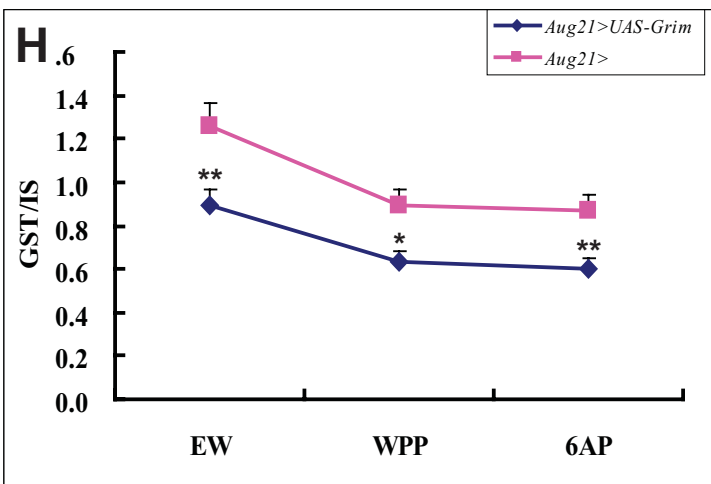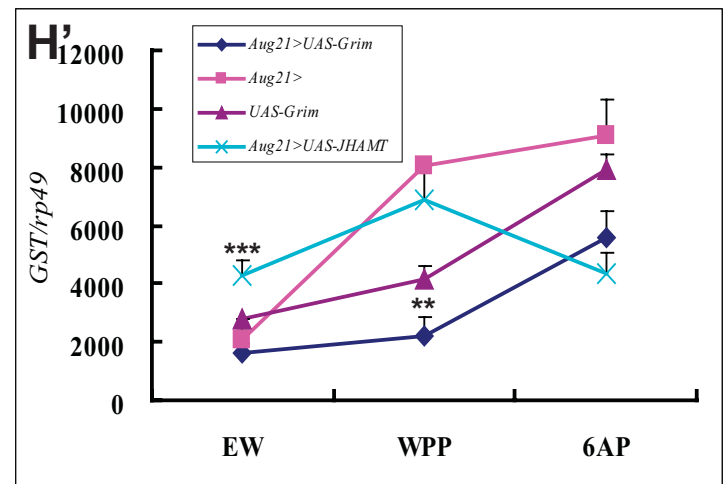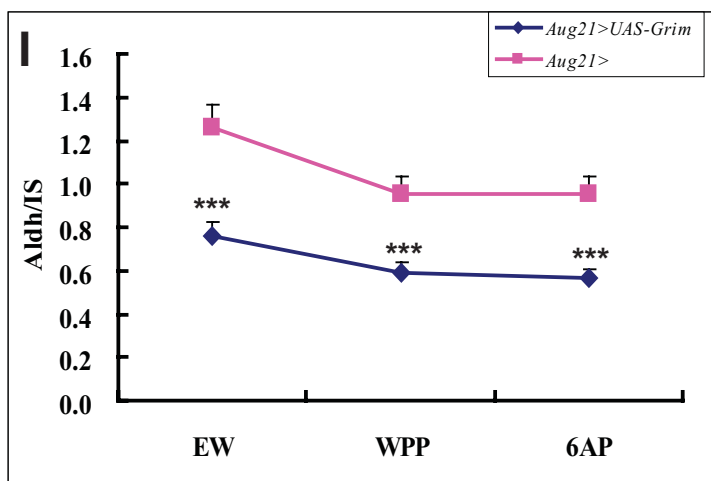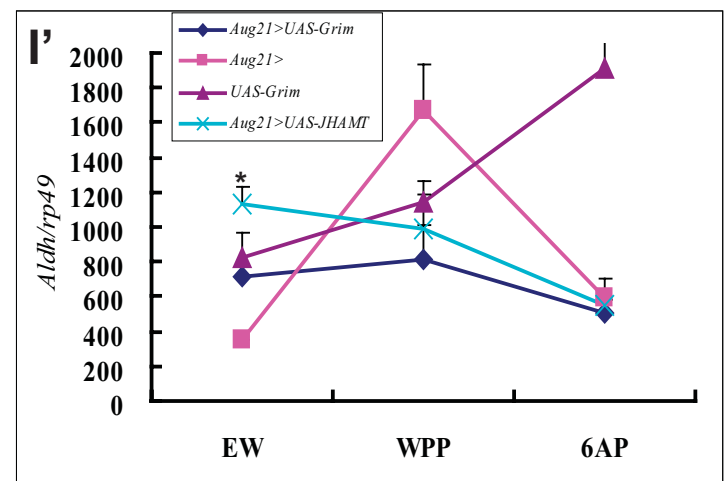

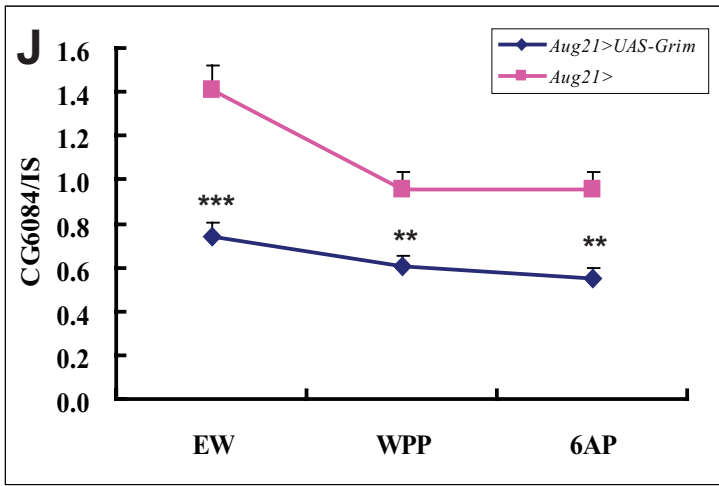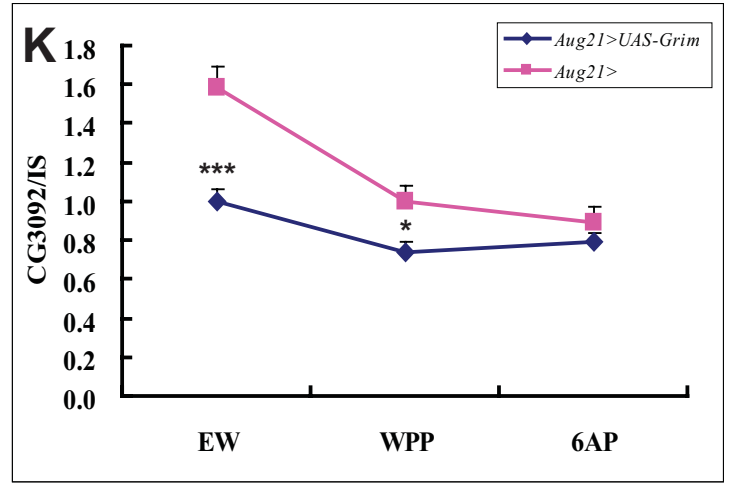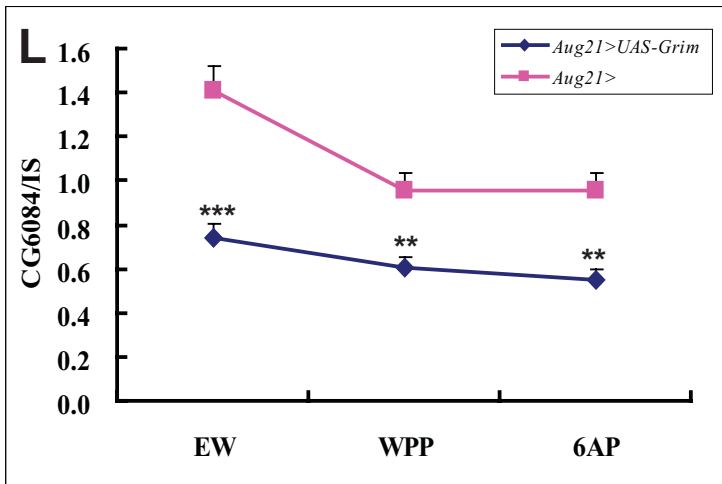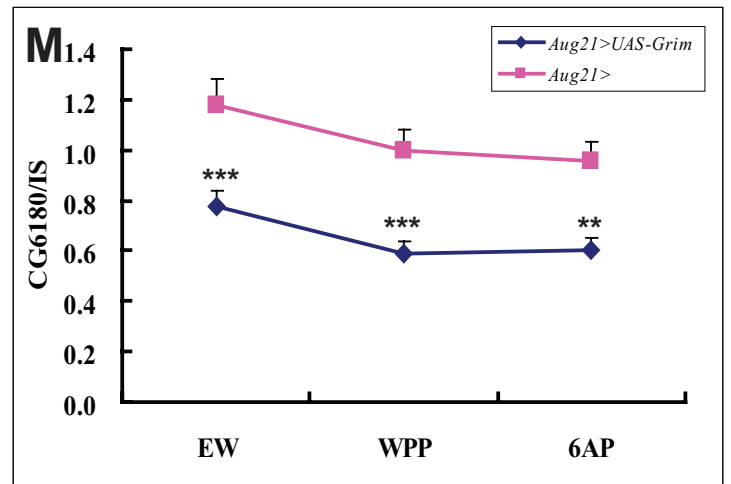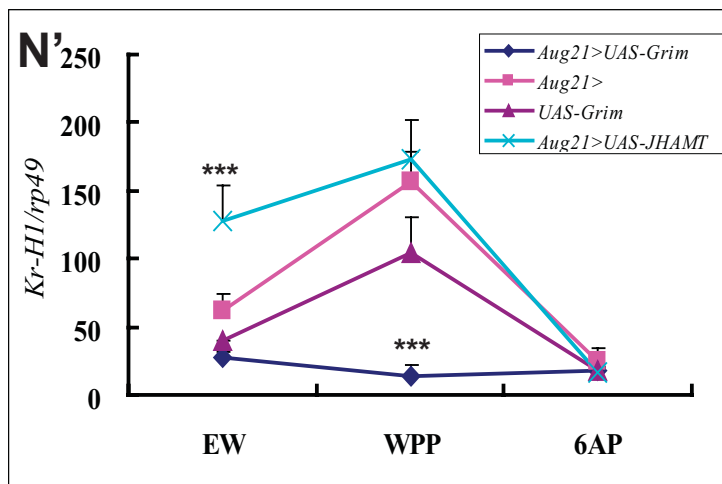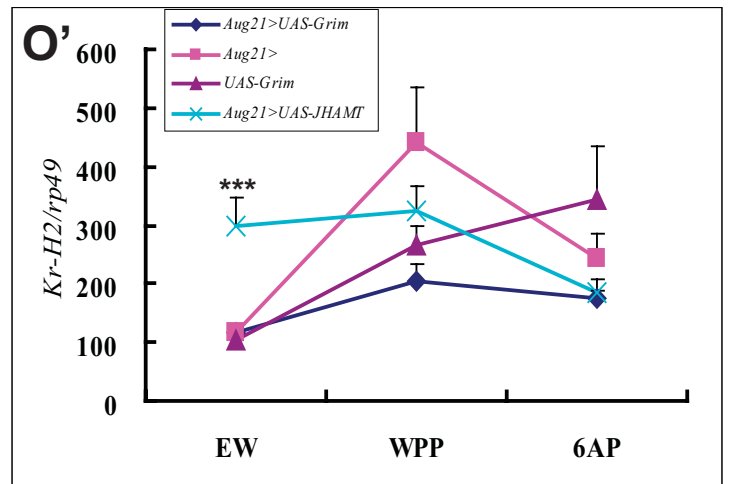

Supplement: dev033712-sup-033712-figs2.pdf [file dev033712-sup-033712-figs2.pdf]
